# Supplementary material for: Host genotype-specific microbiota do not influence the susceptibility of D. magna to a bacterial pathogen
Source: PubMed Central journal article supplement (PMC6010447; doi:10.1038/s41598-018-27681-x), 2018-06-20

**Title: Host genotype-specific microbiota do not influence the susceptibility of *D. magna* to a bacterial pathogen**

Marilou P. Sison-Mangus<sup>1,\*</sup>, César M. J. A. Metzger<sup>2,3</sup> and Dieter Ebert<sup>2</sup>

**Supplementary Table S1.** Cultured bacterial strains used in DNA mock community sequencing.

| Phylum                      | Order                   | Family                   | Strain name               | *Source                  |
|-----------------------------|-------------------------|--------------------------|---------------------------|--------------------------|
| <i>Actinobacteria</i>       | <i>Actinomycetales</i>  | <i>Gordoniaceae</i>      | <i>Gordonia01</i>         | @Daphnia_Field           |
| <i>Actinobacteria</i>       | <i>Actinomycetales</i>  | <i>Micrococcaceae</i>    | <i>Kocuria02b</i>         | Daphnia_Field            |
| <i>Actinobacteria</i>       | <i>Actinomycetales</i>  | <i>Micrococcaceae</i>    | <i>Micrococcus01c</i>     | Daphnia_Field            |
| <i>Actinobacteria</i>       | <i>Actinomycetales</i>  | <i>Nocardiaceae</i>      | <i>Rhodococcus01</i>      | Daphnia_Field            |
| <i>Alpha-proteobacteria</i> | <i>Sphingomonadales</i> | <i>Sphingomonadaceae</i> | <i>Sphingobium01a</i>     | \$ADaM                   |
| <i>Alpha-proteobacteria</i> | <i>Sphingomonadales</i> | <i>Sphingomonadaceae</i> | <i>Sphingobium02a</i>     | ADaM                     |
| <i>Alpha-proteobacteria</i> | <i>Sphingomonadales</i> | <i>Sphingomonadaceae</i> | <i>Sphingomonas01b</i>    | ADaM                     |
| <i>Alpha-proteobacteria</i> | <i>Sphingomonadales</i> | <i>Sphingomonadaceae</i> | <i>Sphingomonas02b</i>    | #Algae                   |
| <i>Alpha-proteobacteria</i> | <i>Sphingomonadales</i> | <i>Sphingomonadaceae</i> | <i>Sphingomonas03</i>     | ADaM                     |
| <i>Alpha-proteobacteria</i> | <i>Sphingomonadales</i> | <i>Sphingomonadaceae</i> | <i>Sphingomonas04</i>     | ADaM                     |
| <i>Alpha-proteobacteria</i> | <i>Sphingomonadales</i> | <i>Sphingomonadaceae</i> | <i>Sphingomonas05</i>     | ADaM                     |
| <i>Alpha-proteobacteria</i> | <i>Sphingomonadales</i> | <i>Sphingomonadaceae</i> | <i>Sphingomonas06a</i>    | Algae                    |
| <i>Alpha-proteobacteria</i> | <i>Sphingomonadales</i> | <i>Sphingomonadaceae</i> | <i>Sphingomonas07</i>     | ADaM                     |
| <i>Alpha-proteobacteria</i> | <i>Sphingomonadales</i> | <i>Sphingomonadaceae</i> | <i>Sphingomonas08</i>     | ADaM                     |
| <i>Alpha-proteobacteria</i> | <i>Sphingomonadales</i> | <i>Sphingomonadaceae</i> | <i>Sphingopyxis01</i>     | <sup>1</sup> Daphnia_Lab |
| <i>Alphaproteobacteria</i>  | <i>Caulobacterales</i>  | <i>Caulobacteraceae</i>  | <i>Brevundimonas01b</i>   | ADaM                     |
| <i>Alphaproteobacteria</i>  | <i>Caulobacterales</i>  | <i>Caulobacteraceae</i>  | <i>Brevundimonas02</i>    | Algae                    |
| <i>Alphaproteobacteria</i>  | <i>Caulobacterales</i>  | <i>Caulobacteraceae</i>  | <i>Brevundimonas01c</i>   | ADaM                     |
| <i>Alphaproteobacteria</i>  | <i>Caulobacterales</i>  | <i>Caulobacteraceae</i>  | <i>Brevundimonas04</i>    | ADaM                     |
| <i>Alphaproteobacteria</i>  | <i>Caulobacterales</i>  | <i>Caulobacteraceae</i>  | <i>Brevundimonas05</i>    | ADaM                     |
| <i>Alphaproteobacteria</i>  | <i>Caulobacterales</i>  | <i>Caulobacteraceae</i>  | <i>Brevundimonas06</i>    | ADaM                     |
| <i>Alphaproteobacteria</i>  | <i>Caulobacterales</i>  | <i>Caulobacteraceae</i>  | <i>Brevundimonas01d</i>   | Algae                    |
| <i>Alphaproteobacteria</i>  | <i>Caulobacterales</i>  | <i>Caulobacteraceae</i>  | <i>Brevundimonas08</i>    | ADaM                     |
| <i>Alphaproteobacteria</i>  | <i>Rhizobiales</i>      | <i>Rhizobiaceae</i>      | <i>Rhizobium01</i>        | ADaM                     |
| <i>Alphaproteobacteria</i>  | <i>Rhizobiales</i>      | <i>Rhizobiaceae</i>      | <i>Rhizobium02</i>        | Algae                    |
| <i>Alphaproteobacteria</i>  | <i>Rhizobiales</i>      | <i>Rhizobiaceae</i>      | <i>Rhizobium03</i>        | Daphnia_Field            |
| <i>Bacteroidetes</i>        | <i>Flavobacteriales</i> | [ <i>Weeksellaceae</i> ] | <i>Chryseobacterium01</i> | Daphnia_Field            |
| <i>Bacteroidetes</i>        | <i>Flavobacteriales</i> | <i>Flavobacteriaceae</i> | <i>Flavobacterium01</i>   | Daphnia_Field            |
| <i>Beta-proteobacteria</i>  | <i>Burkholderiales</i>  |                          | <i>Burkholderiales01</i>  | ADaM                     |

| <b>Phylum</b>               | <b>Order</b>             | <b>Family</b>                | <b>Strain name</b>          | <b>*Source</b> |
|-----------------------------|--------------------------|------------------------------|-----------------------------|----------------|
| <i>Beta-proteobacteria</i>  | <i>Burkholderiales</i>   |                              | <i>Burkholderiales02</i>    | ADaM           |
| <i>Beta-proteobacteria</i>  | <i>Burkholderiales</i>   | <i>Comamonadaceae</i>        | <i>Hydrogenophaga01</i>     | Daphnia_Field  |
| <i>Beta-proteobacteria</i>  | <i>Burkholderiales</i>   | <i>Comamonadaceae</i>        | <i>Hydrogenophaga02</i>     | Daphnia_Lab    |
| <i>Beta-proteobacteria</i>  | <i>Burkholderiales</i>   | <i>Burkholderiaceae</i>      | <i>Limnobacter01</i>        | Daphnia_Field  |
| <i>Beta-proteobacteria</i>  | <i>Burkholderiales</i>   | <i>Oxalobacteraceae</i>      | <i>Massilia01</i>           | ADaM           |
| <i>Beta-proteobacteria</i>  | <i>Burkholderiales</i>   |                              | <i>Burkholderiales02</i>    | ADaM           |
| <i>Beta-proteobacteria</i>  | <i>Burkholderiales</i>   | <i>Comamonadaceae</i>        | <i>Hydrogenophaga01</i>     | Daphnia_Field  |
| <i>Beta-proteobacteria</i>  | <i>Burkholderiales</i>   | <i>Comamonadaceae</i>        | <i>Hydrogenophaga02</i>     | Daphnia_Lab    |
| <i>Beta-proteobacteria</i>  | <i>Burkholderiales</i>   | <i>Burkholderiaceae</i>      | <i>Limnobacter01</i>        | Daphnia_Field  |
| <i>Beta-proteobacteria</i>  | <i>Burkholderiales</i>   | <i>Oxalobacteraceae</i>      | <i>Massilia01</i>           | ADaM           |
| <i>Beta-proteobacteria</i>  | <i>Burkholderiales</i>   | <i>Oxalobacteraceae</i>      | <i>Massilia02</i>           | ADaM           |
| <i>Beta-proteobacteria</i>  | <i>Burkholderiales</i>   | <i>Oxalobacteraceae</i>      | <i>Massilia03</i>           | ADaM           |
| <i>Beta-proteobacteria</i>  | <i>Burkholderiales</i>   | <i>Oxalobacteraceae</i>      | <i>Ralstonia01a</i>         | Algae          |
| <i>Beta-proteobacteria</i>  | <i>Enterobacteriales</i> | <i>Enterobacteriaceae</i>    | <i>Serratia01</i>           | Daphnia_Field  |
| <i>Beta-proteobacteria</i>  | <i>Burkholderiales</i>   | <i>Comamonadaceae</i>        | <i>Variovorax01a</i>        | Algae          |
| <i>Beta-proteobacteria</i>  | <i>Burkholderiales</i>   | <i>Comamonadaceae</i>        | <i>Variovorax01b</i>        | Algae          |
| <i>Firmicutes</i>           | <i>Bacillales</i>        | <i>Bacillaceae</i>           | <i>Bacillus01</i>           | Algae          |
| <i>Firmicutes</i>           | <i>Bacillales</i>        | <i>Bacillaceae</i>           | <i>Bacillus02b</i>          | Algae          |
| <i>Firmicutes</i>           | <i>Bacillales</i>        | <i>Planococcaceae</i>        | <i>Bacillus03b</i>          | Daphnia_Field  |
| <i>Firmicutes</i>           | <i>Bacillales</i>        | <i>Planococcaceae</i>        | <i>Bacillus05b</i>          | Daphnia_Field  |
| <i>Firmicutes</i>           | <i>Bacillales</i>        | <i>Planococcaceae</i>        | <i>Bacillus07</i>           | Daphnia_Field  |
| <i>Firmicutes</i>           | <i>Bacillales</i>        | [ <i>Exiguobacteraceae</i> ] | <i>Exiguobacterium02</i>    | Algae          |
| <i>Gamma-proteobacteria</i> | <i>Pseudomonadales</i>   | <i>Moraxellaceae</i>         | <i>Acinetobacter01</i>      | Algae          |
| <i>Gamma-proteobacteria</i> | <i>Pseudomonadales</i>   | <i>Moraxellaceae</i>         | <i>Acinetobacter02</i>      | ADaM           |
| <i>Gamma-proteobacteria</i> | <i>Pseudomonadales</i>   | <i>Pseudomonadaceae</i>      | <i>Aeromonas02</i>          | Daphnia_Field  |
| <i>Gamma-proteobacteria</i> | <i>Pseudomonadales</i>   | <i>Pseudomonadaceae</i>      | <i>Aeromonas03</i>          | Daphnia_Lab    |
| <i>Gamma-proteobacteria</i> | <i>Pseudomonadales</i>   | <i>Pseudomonadaceae</i>      | <i>Aeromonas03a</i>         | Daphnia_Field  |
| <i>Gamma-proteobacteria</i> | <i>Pseudomonadales</i>   | <i>Pseudomonadaceae</i>      | <i>Aeromonas03b</i>         | Daphnia_Field  |
| <i>Gamma-proteobacteria</i> | <i>Xanthomonadales</i>   | <i>Xanthomonadaceae</i>      | <i>Pseudoxanthomonas01a</i> | Algae          |
| <i>Gamma-proteobacteria</i> | <i>Bacillales</i>        | <i>Staphylococcaceae</i>     | <i>Staphylococcus01</i>     | Algae          |
| <i>Gamma-proteobacteria</i> | <i>Bacillales</i>        | <i>Staphylococcaceae</i>     | <i>Staphylococcus02</i>     | Daphnia_Field  |

| Phylum                      | Order                  | Family                  | Strain name               | *Source       |
|-----------------------------|------------------------|-------------------------|---------------------------|---------------|
| <i>Gamma-proteobacteria</i> | <i>Xanthomonadales</i> | <i>Xanthomonadaceae</i> | <i>Xanthomonadaceae01</i> | Daphnia_Field |
| <i>Gamma-proteobacteria</i> | <i>Pseudomonadales</i> | <i>Moraxellaceae</i>    | <i>Enhydrobacter01b</i>   | ADaM          |
| <i>Gamma-proteobacteria</i> | <i>Pseudomonadales</i> | <i>Pseudomonadaceae</i> | <i>Pseudomonas01</i>      | ADaM          |
| <i>Gamma-proteobacteria</i> | <i>Pseudomonadales</i> | <i>Pseudomonadaceae</i> | <i>Pseudomonas01a</i>     | ADaM          |
| <i>Gamma-proteobacteria</i> | <i>Pseudomonadales</i> | <i>Pseudomonadaceae</i> | <i>Pseudomonas02a</i>     | Daphnia_Field |
| <i>Gamma-proteobacteria</i> | <i>Pseudomonadales</i> | <i>Pseudomonadaceae</i> | <i>Pseudomonas02b</i>     | Daphnia_Field |
| <i>Gamma-proteobacteria</i> | <i>Pseudomonadales</i> | <i>Pseudomonadaceae</i> | <i>Pseudomonas02c</i>     | Algae         |
| <i>Gamma-proteobacteria</i> | <i>Pseudomonadales</i> | <i>Pseudomonadaceae</i> | <i>Pseudomonas02d</i>     | Algae         |
| <i>Gamma-proteobacteria</i> | <i>Pseudomonadales</i> | <i>Pseudomonadaceae</i> | <i>Pseudomonas03a</i>     | ADaM          |
| <i>Gamma-proteobacteria</i> | <i>Pseudomonadales</i> | <i>Pseudomonadaceae</i> | <i>Pseudomonas03b</i>     | ADaM          |
| <i>Gamma-proteobacteria</i> | <i>Pseudomonadales</i> | <i>Pseudomonadaceae</i> | <i>Pseudomonas04a</i>     | ADaM          |
| <i>Gamma-proteobacteria</i> | <i>Pseudomonadales</i> | <i>Pseudomonadaceae</i> | <i>Pseudomonas04b</i>     | ADaM          |
| <i>Gamma-proteobacteria</i> | <i>Pseudomonadales</i> | <i>Pseudomonadaceae</i> | <i>Pseudomonas06c</i>     | Daphnia_Field |
| <i>Gamma-proteobacteria</i> | <i>Pseudomonadales</i> | <i>Pseudomonadaceae</i> | <i>Pseudomonas06d</i>     | Daphnia_Field |
| <i>Gamma-proteobacteria</i> | <i>Pseudomonadales</i> | <i>Pseudomonadaceae</i> | <i>Pseudomonas07b</i>     | Daphnia_Field |
| <i>Gamma-proteobacteria</i> | <i>Pseudomonadales</i> | <i>Pseudomonadaceae</i> | <i>Pseudomonas07c</i>     | Daphnia_Field |
| <i>Gamma-proteobacteria</i> | <i>Pseudomonadales</i> | <i>Pseudomonadaceae</i> | <i>Pseudomonas10a</i>     | Daphnia_Field |
| <i>Gamma-proteobacteria</i> | <i>Pseudomonadales</i> | <i>Pseudomonadaceae</i> | <i>Pseudomonas10b</i>     | Daphnia_Field |
| <i>Gamma-proteobacteria</i> | <i>Pseudomonadales</i> | <i>Pseudomonadaceae</i> | <i>Pseudomonas12</i>      | Daphnia_Field |
| <i>Gamma-proteobacteria</i> | <i>Pseudomonadales</i> | <i>Pseudomonadaceae</i> | <i>Pseudomonas15</i>      | Daphnia_Field |
| <i>Thermi</i>               | <i>Deinococcales</i>   | <i>Deinococcaceae</i>   | <i>Deinococcus02</i>      | Algae         |

\*Bacteria where isolated from the following sources:

@Daphnia\_Field- animal freshly collected from freshwater pond in Aegelsee, CH

<sup>1</sup>Daphnia\_Lab – cultured animal maintained in ADaM in the lab

<sup>\$</sup>ADaM – culture medium for growing *Daphnia*

<sup>#</sup>Algae – algal food (*Scenedesmus* sp.) culture

**Supplementary Fig. S1.** Proportions of mock DNA bacterial community and the resulting 16s rDNA sequence after 454 sequencing. All, except Actinobacteria strains and 2 Burkholderiales strains, showed up in the sequencing of the mock community.

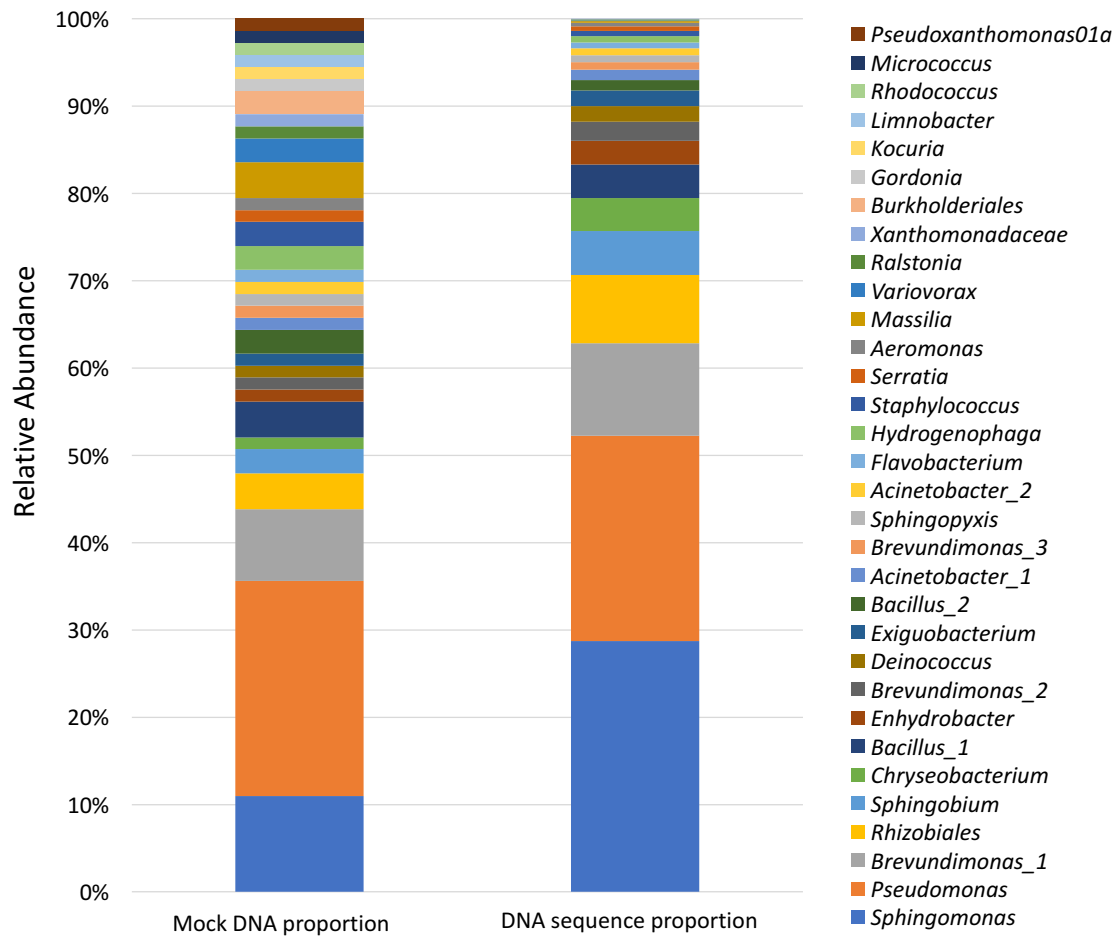

**Supplementary Fig. S2.** Relative abundance of microbiome present in 8 *Daphnia* genotypes (n= 31) at the genus/family taxonomic level.

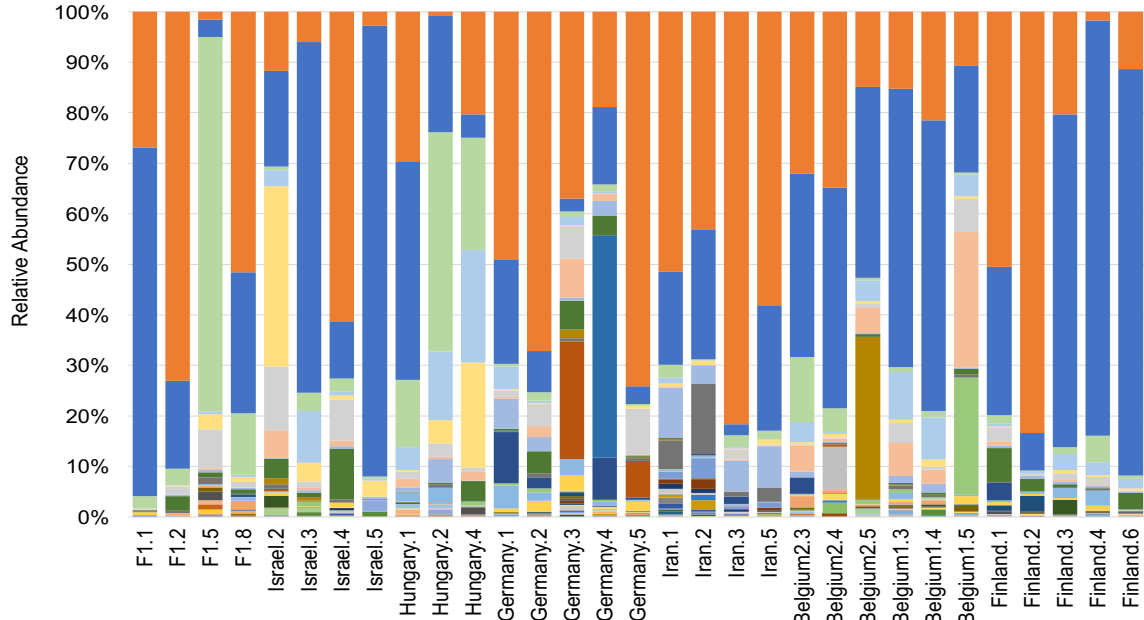

- Bacteroidetes;c\_\_[Saprosirae];o\_\_[Saprosirales];f\_\_g\_\_
- Betaproteobacteria;o\_\_Burkholderiales;f\_\_Comamonadaceae;g\_\_Limnhabitans
- Alphaproteobacteria;o\_\_Rhodobacterales;f\_\_Rhodobacteraceae;g\_\_Rhodobacter
- Bacteroidetes;c\_\_Cytophagia;o\_\_Cytophagales;f\_\_Cytophagaceae;g\_\_Emticicia
- Betaproteobacteria;o\_\_Burkholderiales;f\_\_Comamonadaceae;g\_\_
- Alphaproteobacteria;o\_\_Sphingomonadales;f\_\_Sphingomonadaceae;g\_\_Blastomonas
- Alphaproteobacteria;o\_\_Sphingomonadales;f\_\_g\_\_
- Bacteroidetes;c\_\_Cytophagia;o\_\_Cytophagales;f\_\_Cytophagaceae;g\_\_Rudanella
- Bacteroidetes;c\_\_[Saprosirae];o\_\_[Saprosirales];f\_\_Saprosiraceae;g\_\_
- Bacteroidetes;c\_\_Sphingobacteriia;o\_\_Sphingobacteriales;f\_\_Sphingobacteriaceae;g\_\_Pedobacter
- Bacteroidetes;c\_\_Flavobacteriia;o\_\_Flavobacteriales;f\_\_Flavobacteriaceae;g\_\_Flavobacterium
- Alphaproteobacteria;o\_\_Rhizobiales;f\_\_g\_\_
- Bacteroidetes;c\_\_Sphingobacteriia;o\_\_Sphingobacteriales;f\_\_Sphingobacteriaceae;g\_\_
- Alphaproteobacteria;o\_\_Rhizobiales;f\_\_Rhizobiaceae;g\_\_Ensifer
- Betaproteobacteria;c\_\_Flavobacteriia;o\_\_Flavobacteriales;f\_\_[Weeksellaceae];g\_\_Chryseobacterium
- Bacteroidetes;c\_\_Cytophagia;o\_\_Cytophagales;f\_\_Cytophagaceae;g\_\_Runella
- Alphaproteobacteria;o\_\_Sphingomonadales;f\_\_Sphingomonadaceae;g\_\_Sphingobium
- Firmicutes;c\_\_Bacilli;o\_\_Bacillales;f\_\_Bacillaceae;g\_\_Bacillus
- Bacteroidetes;c\_\_[Saprosirae];o\_\_[Saprosirales];f\_\_Chitinophagaceae;g\_\_Sediminibacterium
- Chlamydiae;c\_\_Chlamydia;o\_\_Chlamydiales;f\_\_Parachlamydiaceae;g\_\_CandidatusProtochlamydia
- Gammaproteobacteria;o\_\_Pseudomonadales;f\_\_Pseudomonadaceae;g\_\_Pseudomonas
- Deltaproteobacteria;o\_\_Spirobaclales;f\_\_g\_\_
- Alphaproteobacteria;o\_\_Sphingomonadales;f\_\_Sphingomonadaceae;g\_\_Sphingomonas
- Alphaproteobacteria;o\_\_Caulobacterales;f\_\_Caulobacteraceae;g\_\_Arthrospira
- Gammaproteobacteria;o\_\_Legionellales;f\_\_Legionellaceae;g\_\_Legionella
- Gammaproteobacteria;o\_\_Oceanospirillales;f\_\_Halomonadaceae;g\_\_
- Bacteroidetes;c\_\_Cytophagia;o\_\_Cytophagales;f\_\_Cytophagaceae;g\_\_Leadbetterella
- Deltaproteobacteria;o\_\_Myxococcales;f\_\_g\_\_
- No blast hit;Other;Other;Other;Other;Other
- Gammaproteobacteria;o\_\_Xanthomonadales;f\_\_Sinobacteraceae;g\_\_
- Bacteroidetes;c\_\_[Saprosirae];o\_\_[Saprosirales];f\_\_Chitinophagaceae;g\_\_
- Betaproteobacteria;o\_\_Burkholderiales;f\_\_Comamonadaceae;g\_\_Hydrogenophaga
- Betaproteobacteria;o\_\_Burkholderiales;f\_\_g\_\_
- Alphaproteobacteria;o\_\_Rhizobiales;f\_\_Bradyrhizobiaceae;g\_\_
- Alphaproteobacteria;o\_\_Rhizobiales;f\_\_Xanthobacteraceae;g\_\_Azorhizobium
- Alphaproteobacteria;o\_\_Rhizobiales;f\_\_Rhizobiaceae;g\_\_Agrobacterium
- Alphaproteobacteria;o\_\_Rhizobiales;f\_\_Hyphomicrobiaceae;g\_\_Devosia
- Gammaproteobacteria;o\_\_Legionellales;f\_\_Legionellaceae;g\_\_
- Firmicutes;c\_\_Bacilli;o\_\_Bacillales;f\_\_Bacillaceae;g\_\_Anoxybacillus
- Alphaproteobacteria;o\_\_Rhizobiales;f\_\_Rhizobiaceae;g\_\_Shinella
- Alphaproteobacteria;o\_\_Caulobacterales;f\_\_Caulobacteraceae;g\_\_Caulobacter
- Alphaproteobacteria;o\_\_Sphingomonadales;f\_\_Sphingomonadaceae;g\_\_Novosphingobium
- Betaproteobacteria;o\_\_Rhodocyclales;f\_\_Rhodocyclaceae;g\_\_
- OD1;c\_\_ZB2;o\_\_f\_\_g\_\_
- Alphaproteobacteria;o\_\_Rhizobiales;f\_\_Xanthobacteraceae;g\_\_Xanthobacter
- Gammaproteobacteria;o\_\_Pseudomonadales;f\_\_Moraxellaceae;g\_\_Acinetobacter
- Bacteroidetes;c\_\_Sphingobacteriia;o\_\_Sphingobacteriales;f\_\_g\_\_
- Alphaproteobacteria;o\_\_Rhodobacterales;f\_\_Rhodobacteraceae;g\_\_

**Supplementary Fig. S3.** Biplot of db-RDA analysis using Weighted UniFrac Distance, showing the clustering of microbiome composition between *D. magna* samples, with the analysis constrained by their resistotype to each *P. ramosa* strain a) Pr\_C1, b) Pr\_C19, c) Pr\_P15, and d) Pr\_P20. R (resistant) and S (susceptible) act as centroids to the clusters. Red colored samples belong to the susceptible resistotype and black colored samples belong to the resistant resistotype for the respective *P. ramosa* strains. Pseudo-F and p values < 0.05 denotes statistically significant variation between the microbiome of the *Daphnia* resistotypes.

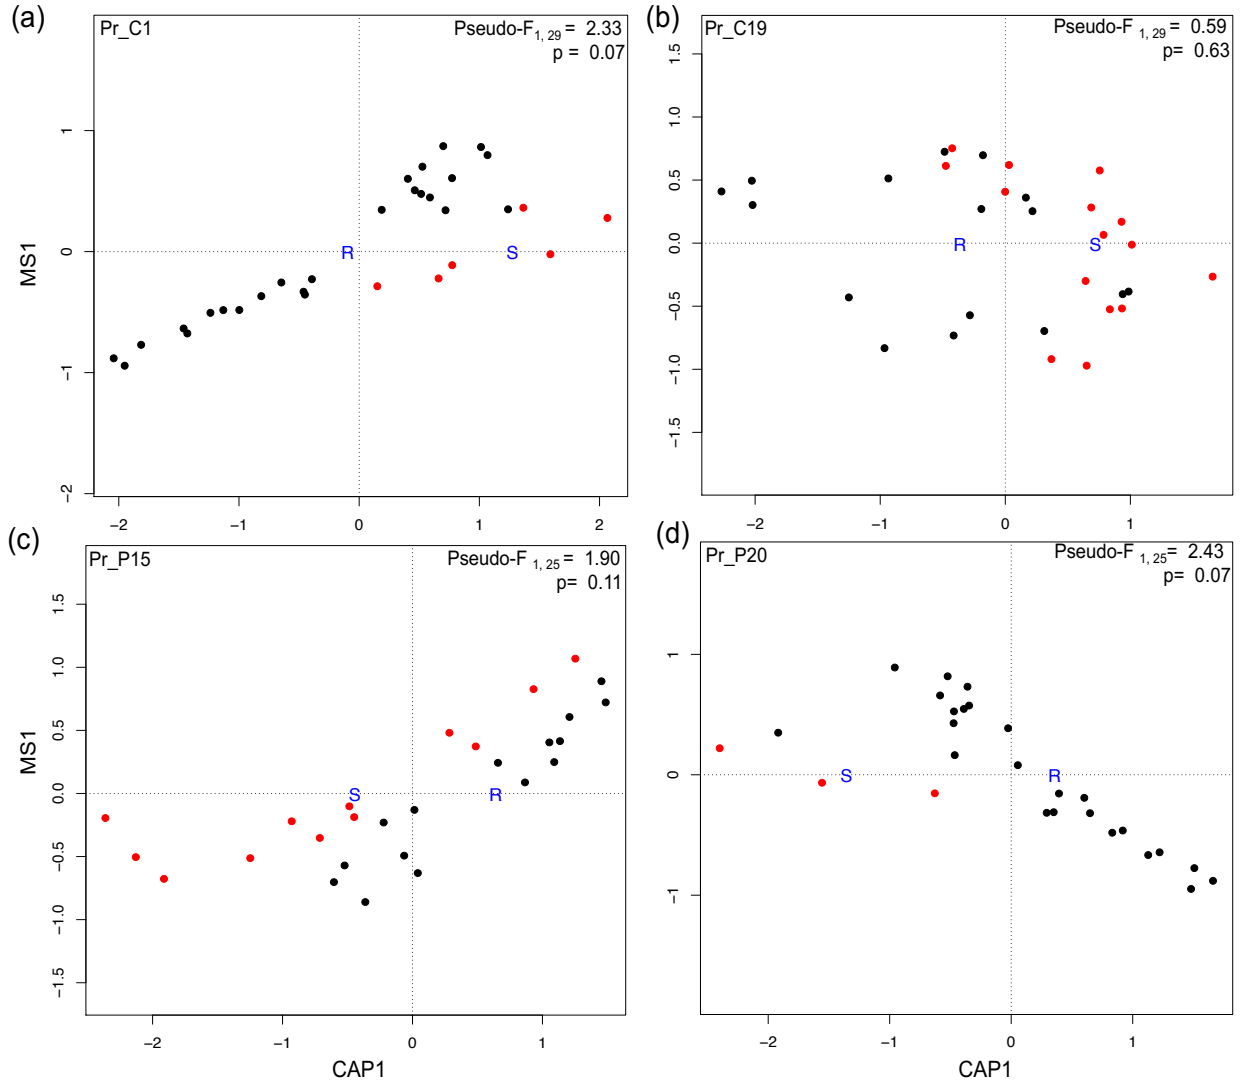

**Supplementary Fig. S4.** Biplot of db-RDA analysis using Bray-Curtis Distance, showing the clustering of microbiome composition between *D. magna* samples, with the analysis constrained by their resistotype to each *P. ramosa* strain a) Pr\_C1, b) Pr\_C19, c) Pr\_P15, and d) Pr\_P20. R (resistant) and S (susceptible) act as centroids to the clusters. Red colored samples belong to the susceptible resistotype and black colored samples belong to the resistant resistotype for the respective *P. ramosa* strains. Pseudo-F and p values < 0.05 denotes statistically significant variation between the microbiome of the *Daphnia* resistotypes.

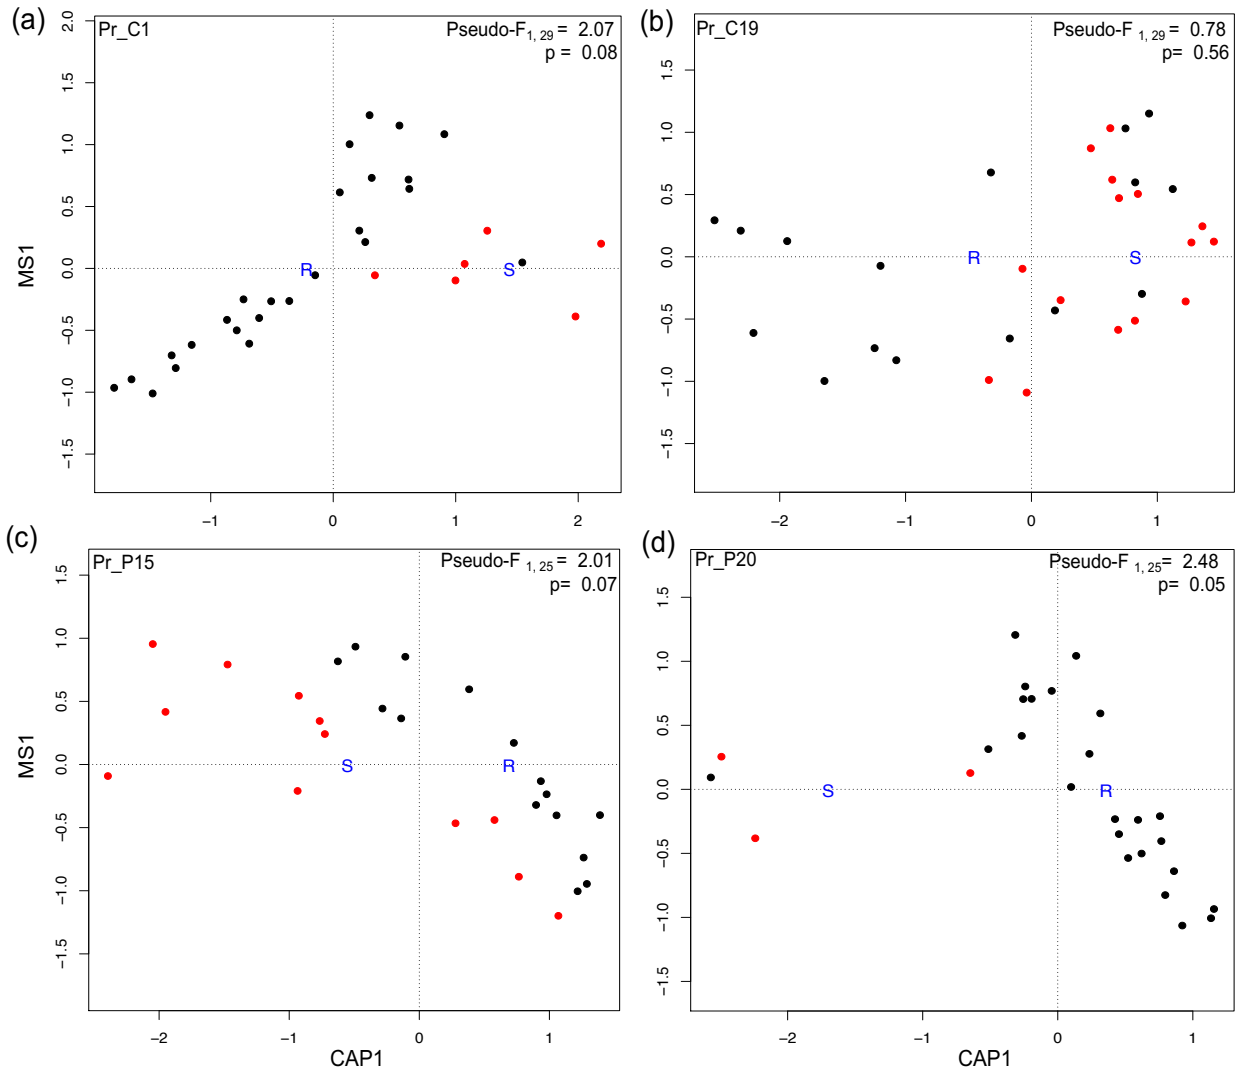

Supplement: 41598_2018_27681_MOESM1_ESM.pdf [file 41598_2018_27681_MOESM1_ESM.pdf]
